# Supplementary material for: PAX7 Balances the Cell Cycle Progression via Regulating Expression of Dnmt3b and Apobec2 in Differentiating PSCs
Source: MDPI journal article supplement (doi:10.3390/cells10092205), 2021-08-26
Supplement: s1 [file s1]

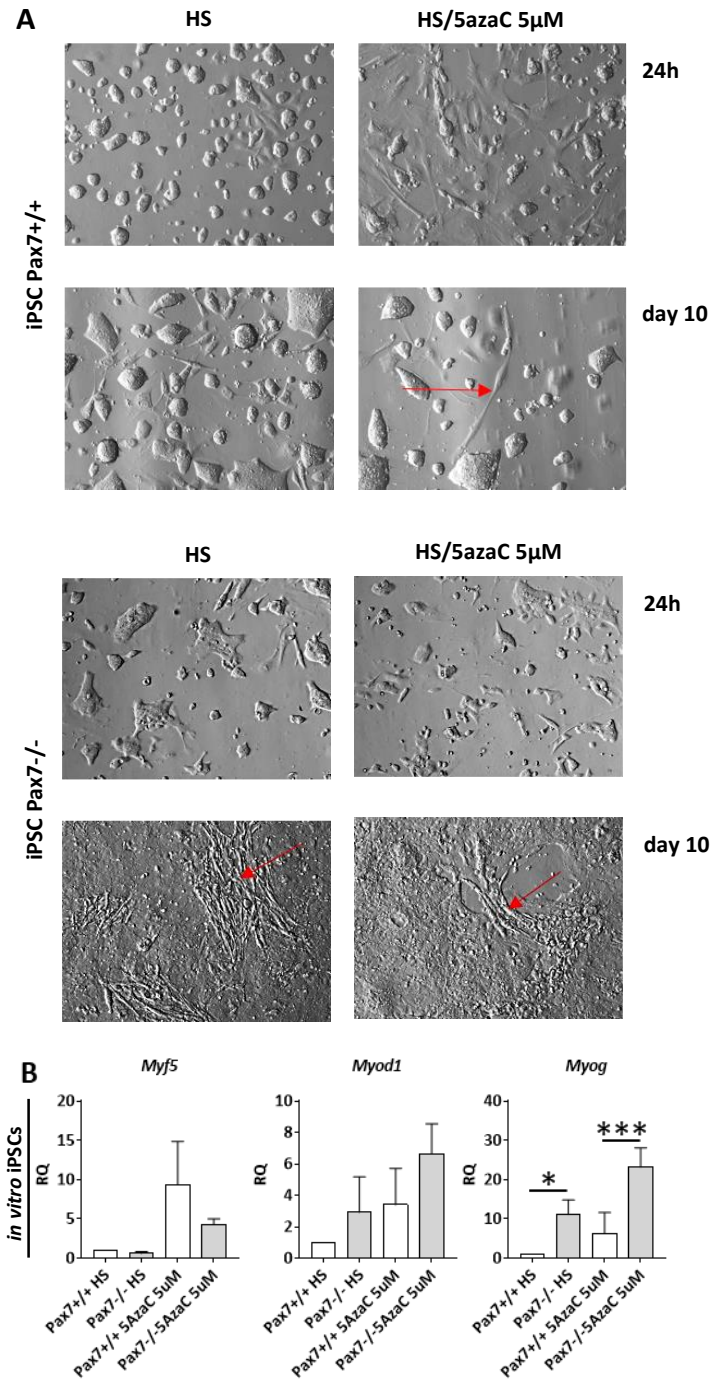

**Figure S2. Myogenic differentiation of Pax7<sup>+/+</sup> and Pax7<sup>-/-</sup> iPSCs treated with HS and 5-azacytidine.** (A) Morphology of iPSCs cultured for 24h in medium supplemented with horse serum (HS) and 5 $\mu$ M 5azaC and then for 10 days in medium with HS. Control cells were cultured in the medium lacking 5azaC. Red arrows indicate myotube-like structures. (B) Expression of *Myf5*, *Myod1*, and *Myog* mRNAs.

White bars – values for Pax7<sup>+/+</sup> iPSCs, gray bars – values for Pax7<sup>-/-</sup> iPSCs. Expression was related to the levels observed in 13.5 d.p.c. mouse embryo (E13.5), and normalized to mRNA encoding  $\beta$ -actin (*Actb*). Data are presented as mean $\pm$ SD. Stars symbolizes result of Two-way ANOVA and post-hoc Sidak's multiple comparisons test: \*p<0.05; \*\*\*p<0.001.
