# Supplementary material for: PAX7 Balances the Cell Cycle Progression via Regulating Expression of Dnmt3b and Apobec2 in Differentiating PSCs
Source: MDPI journal article supplement (doi:10.3390/cells10092205), 2021-08-26
Supplement: s1 [file s1]

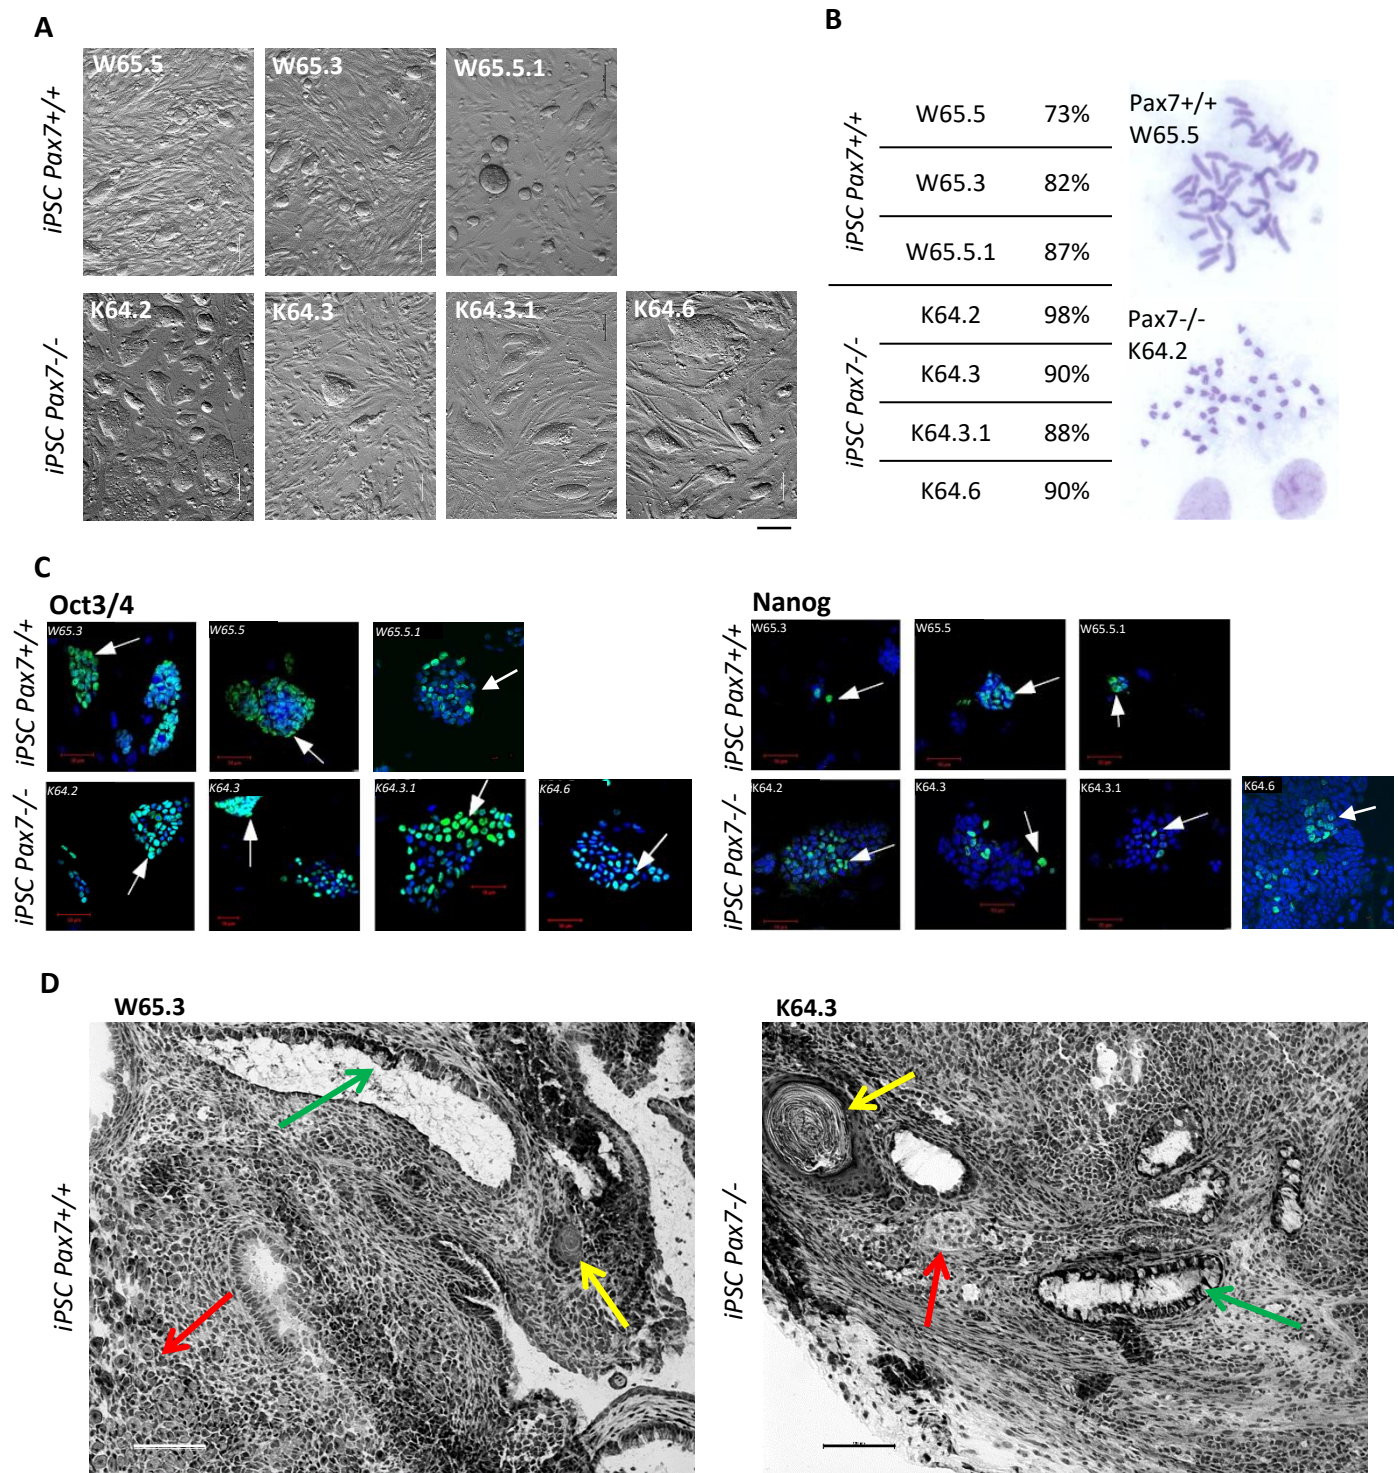

**Figure S1. Characteristics of *Pax7*<sup>+/+</sup> (W65.5, W65.3, W65.5.1), and *Pax7*<sup>-/-</sup> (K64.2, K64.3, K64.3.1, K64.6) iPSC line.** (A) Morphology of iPSC lines, colonies cultured under pluripotency supporting conditions. Scale bar 100  $\mu$ m (B) Karyotype analysis. Table - proportion of 2n metaphase plates (2n karyotype) in analyzed iPSC lines; at least 30 metaphase plates were analyzed for each cell line. (C) Localization of Oct3/4 (green) or Nanog (green) and nuclei (blue) in undifferentiated *Pax7*<sup>+/+</sup> and *Pax7*<sup>-/-</sup> iPSCs colonies. Scale bar 50  $\mu$ m. (D) Histological analysis of teratomas derived from *Pax7*<sup>+/+</sup> and *Pax7*<sup>-/-</sup> iPSCs; representative photos for *Pax7*<sup>+/+</sup> iPSCs (W65.3) and *Pax7*<sup>-/-</sup> iPSC (K64.3). Sections stained with Harris' Hematoxylin and Gomori's Trichrome. Ectodermal structures – yellow arrows, mesodermal structures – red arrows, endodermal structures – green. Scale bar 100  $\mu$ m.
