# Supplementary material for: PAX7 Balances the Cell Cycle Progression via Regulating Expression of Dnmt3b and Apobec2 in Differentiating PSCs
Source: MDPI journal article supplement (doi:10.3390/cells10092205), 2021-08-26
Supplement: s1 [file s1]

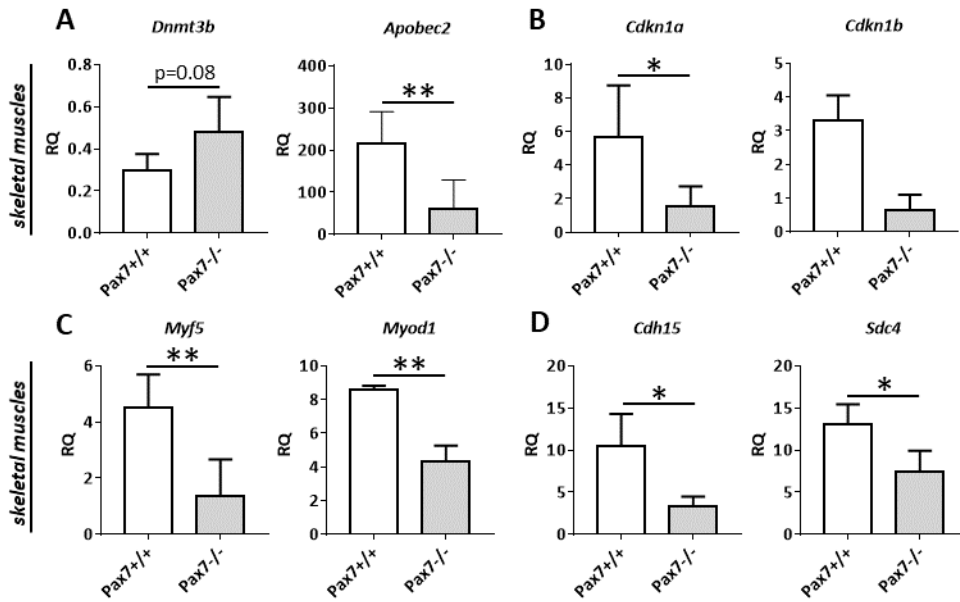

**Figure S3. Expression of selected genes in muscles obtained from Pax7<sup>+/+</sup> and Pax7<sup>-/-</sup> 14 day old mice.** (A) Expression of *Dnmt3b* and *Apobec2* mRNAs. (B) Expression of *Cdkn1a* and *Cdkn1b* mRNAs. (C) Expression of *Myf5* and *Myod1* mRNAs. (D) Expression of *Cdh15* and *Sdc4* mRNAs.

White bars – values for Pax7<sup>+/+</sup> muscles, gray bars – values for Pax7<sup>-/-</sup> muscles. Expression was related to the levels observed in 13.5 d.p.c. mouse embryo (E13.5), and normalized to mRNA encoding  $\beta$ -actin (*Actb*). Data are presented as mean $\pm$ SD. (A - *Apobec2*) Stars represent results of Student's unpaired two-tailed *t*-test: \*\**p*<0.01. (B - *Cdkn1a*) Stars represent results of Student's unpaired two-tailed *t*-test: \**p*<0.05. (C - *Myf5*) Data characterized by non-normal distribution - stars symbolizes results of Mann Whitney test. The level of significance was set at *p*<0.05. (C - *Myod1*) Stars represent results of Student's unpaired two-tailed *t*-test: \*\**p*<0.01. (D - *Cdh15*, *Sdc4*) Stars represent results of Student's unpaired two-tailed *t*-test: \**p*<0.05.
